# Supplementary material for: Identification of hepatic NPC1L1 as an NAFLD risk factor evidenced by ezetimibe‐mediated steatosis prevention and recovery
Source: PubMed Central journal article supplement (PMC6996404; doi:10.1096/fba.2018-00044), 2019-02-13
Supplement: FBA2-1-283-s003.pdf [file FBA2-1-283-s003.pdf]

# Identification of hepatic NPC1L1 as an NAFLD-risk factor evidenced by ezetimibe-mediated steatosis prevention and recovery

Toyoda Y., Takada T. *et al.*

## Supplemental Data

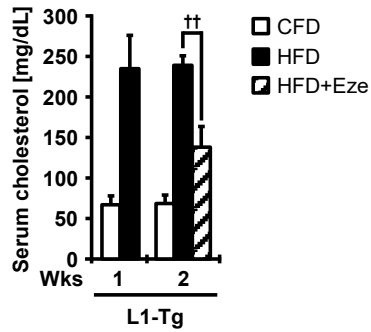

**Fig. S3. Serum levels of cholesterol in L1-Tg mice fed a CFD or a HFD in the absence or presence of ezetimibe.**

CFD, control fat diet; HFD, high-fat diet; Eze, ezetimibe. Data are expressed as the mean  $\pm$  SEM.  $n = 7$  (CFD) and 7 (HFD) at one week; 10 (CFD), 8 (HFD), and 4 (HFD with Eze) at two weeks. Statistical analyses for significant differences were performed using a two-sided  $t$ -test ( $\dagger\dagger$ ,  $P < 0.01$ ).
